# Supplementary material
Source: publisher site journal article supplement (https://www.dovepress.com/article/293560)
Supplement: Supplementary file 1 [file get_supplementary_file.php]

**Supplementary table 1. Characteristics of including subjects by age and gender**

|  | Overall (n=570) | | | 11 yrs  (n=3) | | | 12 yrs  (n=31) | | | 13 yrs  (n=134) | | | 14 yrs  (n=66) | | | 15 yrs  (n=51) | | | 16 yrs  (n=114) | | | 17 yrs  (n=122) | | | 18 yrs  (n=50) | | |
| --- | --- | --- | --- | --- | --- | --- | --- | --- | --- | --- | --- | --- | --- | --- | --- | --- | --- | --- | --- | --- | --- | --- | --- | --- | --- | --- | --- |
|  | Boys (n=272) | Girls (n=298) | P | Boys (n=2) | Girls (n=1) | P | Boys (n=14) | Girls (n=17) | P | Boys (n=61) | Girls (n=73) | P | Boys (n=28) | Girls (n=38) | P | Boys (n=22) | Girls (n=29) | P | Boys (n=60) | Girls (n=54) | P | Boys (n=62) | Girls (n=60) | P | Boys (n=23) | Girls (n=27) | P |
| Height (cm) | 170.05±8.20 | 162.35±29.79 | <0.001 | 154.50±9.19 | 156.00 | 0.916 | 158.93±6.46 | 157.88±6.25 | 0.651 | 163.54±8.10 | 164.99±59.56 | 0.851 | 170.18±5.53 | 159.87±5.72 | ＜0.001 | 170.91±5.32 | 163.00±6.10 | ＜0.001 | 173.78±6.81 | 161.04±5.60 | <0.001 | 173.76±5.90 | 162.92±5.38 | <0.001 | 174.70±4.07 | 162.48±5.18 | <0.001 |
| Weight (Kg) | 62.21±13.99 | 55.89±12.14 | <0.001 | 41.50±2.12 | 57.00 | 0.106 | 56.43±13.01 | 52.29±12.87 | 0.383 | 53.67±13.16 | 52.55±13.63 | 0.630 | 60.30±12.57 | 53.99±11.32 | 0.036 | 62.77±11.39 | 58.76±17.34 | 0.351 | 65.08±11.61 | 58.77±10.14 | 0.003 | 68.48±15.05 | 56.86±7.92 | <0.001 | 67.59±9.94 | 58.82±11.19 | 0.006 |
| BMI (kg/m2) | 21.40±4.04 | 21.58±4.18 | 0.610 | 17.45±1.20 | 23.40 | 0.154 | 22.22±4.51 | 20.82±4.19 | 0.377 | 19.90±3.74 | 20.95±5.19 | 0.189 | 20.76±4.03 | 21.03±3.67 | 0.780 | 21.48±3.74 | 21.95±5.18 | 0.724 | 21.52±3.41 | 22.67±3.82 | 0.093 | 22.70±4.73 | 21.43±2.94 | 0.081 | 22.15±3.11 | 22.20±3.45 | 0.959 |
| SBP (mmHg) | 122.57±72.72 | 112.68±46.72 | 0.052 | 112.50±10.61 | 126.00 | 0.488 | 108.79±12.35 | 109.53±9.88 | 0.853 | 139.93±151.47 | 119.81±92.65 | 0.347 | 115.39±13.02 | 109.76±12.15 | 0.076 | 115.73±11.26 | 109.48±11.55 | 0.059 | 118.23±12.45 | 112.94±10.97 | 0.018 | 120.21±12.57 | 109.27±9.89 | 0.000 | 118.74±10.31 | 109.59±7.88 | 0.001 |
| DBP (mmHg) | 69.76±35.06 | 71.41±38.99 | 0.596 | 61.00±1.41 | 85.00 | 0.046 | 64.36±7.05 | 65.12±9.31 | 0.803 | 71.05±71.49 | 65.58±13.17 | 0.522 | 70.46±8.86 | 70.97±11.81 | 0.849 | 67.32±9.86 | 70.41±7.84 | 0.217 | 69.85±10.41 | 84.17±88.19 | 0.214 | 68.81±12.02 | 69.87±8.47 | 0.575 | 74.36±13.71 | 70.52±8.39 | 0.233 |
| Heart ratio | 79.04±14.21 | 83.52±11.84 | <0.001 | 93.50±7.78 | 90.00 | 0.776 | 84.21±12.00 | 85.76±10.21 | 0.700 | 81.08.±13.06 | 84.23±11.33 | 0.137 | 78.25±12.16 | 81.95±12.00 | 0.223 | 77.86±14.70 | 83.55±13.25 | 0.154 | 78.75±15.03 | 82.02±12.22 | 0.208 | 78.31±16.06 | 84.53±11.72 | 0.016 | 74.09±12.20 | 82.44±12.57 | 0.022 |
| Sleep duration per day (mins) | 492.11±64.72 | 488.16±57.34 | 0.440 | 627.50±45.96 | 452.00 | 0.198 | 529.29±32.22 | 512.85±68.54 | 0.417 | 529.06±51.49 | 505.28±61.89 | 0.018 | 515.71±42.21 | 521.12±42.07 | 0.608 | 485.09±49.68 | 475.26±59.94 | 0.532 | 474.28±66.36 | 475.42±41.07 | 0.914 | 468.63±65.39 | 469.63±55.·16 | 0.982 | 447.52±62.08 | 462.22±50.72 | 0.361 |
| IOP (mmHg) | 16.31±2.60 | 16.24±2.61 | 0.758 | 15.50±3.54 | 19.00 | 0.567 | 17.14±2.83 | 16.29±2.59 | 0.347 | 16.18±2.75 | 16.55±2.57 | 0.426 | 16.39±2.44 | 16.76±2.26 | 0.527 | 15.68±2.68 | 15.90±2.30 | 0.760 | 16.25±2.63 | 15.80±3.04 | 0.395 | 16.37±2.61 | 15.92±2.84 | 0.359 | 16.70±2.33 | 16.33±2.15 | 0.573 |
| Axial length (mm) | 24.13±1.55 | 23.81±1.02 | 0.003 | 24.50±0.37 | 23.26 | 0.222 | 23.92±0  .78 | 24.06±0.90 | 0.643 | 24.12±0.92 | 23.47±1.02 | ＜0.000 | 23.91±0.93 | 23.71±1.08 | 0.426 | 22.96±4.23 | 23.83±0.93 | 0.288 | 24.38±1.06 | 23.86±0.99 | 0.007 | 24.34±1.03 | 24.17±0.99 | 0.374 | 24.41±0.95 | 23.83±0.10 | 0.041 |
| Overall SCP PD (%) | 43.87±4.17 | 44.50±4.54 | 0.087 | 40.50±3.28 | 48.60 | 0.293 | 43.17±3.24 | 44.37±4.21 | 0.393 | 44.66±3.76 | 45.31±4.05 | 0.352 | 44.99±4.04 | 44.28±3.99 | 0.488 | 43.51±5.13 | 43.82±4.87 | 0.824 | 43.05±4.29 | 44.97±5.13 | 0.031` | 44.12±4.49 | 43.41±4.91 | 0.412 | 43.10±3.41 | 45.10±3.92 | 0.064 |
| Superior-SCP PD | 48.84±4.64 | 49.45±4.92 | 0.132 | 46.98±0.47 | 52.84 | 0.062 | 48.58±4.25 | 49.29±5.32 | 0.688 | 49.69±3.96 | 50.13±4.57 | 0.568 | 50.14±4.29 | 49.57±4.26 | 0.603 | 48.39±6.29 | 48.46±5.36 | 0.966 | 48.28±4.70 | 50.32±4.80 | 0.024 | 48.62±5.04 | 48.24±5.54 | 0.699 | 47.97±3.94 | 49.74±4.39 | 0.142 |
| Inferior-SCP PD | 45.30±5.84 | 46.69±5.93 | 0.006 | 39.96±7.89 | 51.27 | 0.450 | 42.97±5.35 | 46.36±5.50 | 0.095 | 46.30±5.28 | 47.41±5.43 | 0.250 | 47.26±5.35 | 46.36±5.88 | 0.536 | 44.32±8.08 | 46.53±6.02 | 0.269 | 44.07±5.46 | 47.38±6.78 | 0.005 | 46.30±5.77 | 45.42±6.23 | 0.422 | 43.97±5.53 | 47.22±5.24 | 0.038 |
| Nasal-SCP PD | 44.81±5.33 | 45.09±6.30 | 0.563 | 38.74±8.10 | 46.40 | 0.581 | 44.05±4.24 | 45.23±5.62 | 0.522 | 45.63±5.09 | 46.23±5.42 | 0.519 | 46.37±4.89 | 44.72±5.72 | 0.239 | 45.33±5.19 | 43.96±7.07 | 0.449 | 43.69±5.43 | 45.10±7.39 | 0.244 | 44.89±5.91 | 44.09±6.50 | 0.477 | 44.07±4.74 | 46.16±4.91 | 0.134 |
| Temporal-SCP PD | 44.40±6.93 | 44.95±6.44 | 0.333 | 40.82±1.15 | 49.76 | 0.099 | 44.50±4.07 | 44.46±5.62 | 0.980 | 44.36±9.70 | 45.25±7.21 | 0  .556 | 45.89±4.80 | 45.14±4.83 | 0.546 | 44.83±5.41 | 44.46±5.66 | 0.813 | 43.24±7.74 | 45.78±5.78 | 0.052 | 45.18±5.11 | 43.35±8.18 | 0.146 | 43.65±4.96 | 46.62±3.61 | 0.018 |
| Overall DCP PD (%) | 50.17±4.25 | 51.27±3.65 | 0.001 | 50.83±6.39 | 47.04 | 0.713 | 50.76±4.90 | 50.61±3.64 | 0.923 | 50.44±3.44 | 51.16±3.82 | 0.267 | 50.11±3.58 | 51.19±3.42 | 0.228 | 51.09±5.98 | 52.50±3.33 | 0.288 | 49.94±4.11 | 51.27±4.23 | 0.091 | 50.04±4.44 | 50.98±3.05 | 0.180 | 49.16±4.61 | 51.68±3.85 | 0.040 |
| Superior-DCP PD | 53.12±5.10 | 54.49±4.36 | 0.001 | 56.27±8.75 | 48.82 | 0.613 | 54.97±5.60 | 53.33±3.81 | 0.342 | 53.18±4.38 | 54.59±4.41 | 0.063 | 52.95±4.55 | 54.56±3.65 | 0.126 | 54.14±7.41 | 55.59±3.86 | 0.366 | 52.92±4.36 | 54.67±5.49 | 0.060 | 52.64±5.57 | 54.40±3.92 | 0.047 | 52.56±5.12 | 53.81±5.07 | 0.392 |
| Inferior-DCP PD | 51.86±5.08 | 53.75±4.50 | <0.001 | 52.37±5.42 | 49.27 | 0.722 | 52.83±5.73 | 53.10±4.15 | 0.882 | 52.42±4.07 | 53.19±4.92 | 0.342 | 51.63±4.65 | 53.29±3.86 | 0.127 | 52.24±6.60 | 54.91±4.55 | 0.094 | 51.50±5.07 | 54.28±5.34 | 0.005 | 51.74±5.34 | 53.69±3.75 | 0.023 | 50.93±5.69 | 54.29±4.07 | 0.019 |
| Nasal-DCP PD | 53.86±4.47 | 55.28±4.06 | <0.001 | 54.11±6.26 | 47.10 | 0.529 | 54.79±4.60 | 54.57±3.20 | 0.876 | 54.28±3.53 | 55.31±3.96 | 0.125 | 53.64±3.91 | 55.01±3.81 | 0.170 | 55.06±5.85 | 56.88±4.19 | 0.201 | 53.43±4.61 | 55.46±4.47 | 0.019 | 53.71±4.42 | 54.85±3.75 | 0.130 | 52.76±5.48 | 55.36±4.52 | 0.072 |
| Temporal-DCP PD | 52.94±7.05 | 54.33±5.90 | 0.011 | 53.51±5.61 | 52.06 | 0.868 | 53.98±4.51 | 54.77±3.50 | 0.583 | 52.19±10.40 | 53.64±7.65 | 0.369 | 52.85±4.06 | 54.82±4.01 | 0.061 | 54.68±5.75 | 55.06±3.71 | 0.305 | 52.12±7.80 | 54. 62±4.26 | 0.040 | 53.39±4.51 | 53.36±7.68 | 0.980 | 53.56±4.59 | 55.04±4.05 | 0.232 |
| FAZ (mm²) | 0.30±0.11 | 0.34±0.11 | <0.001 | 0.18±0.03 | 0.16 | 0.717 | 0.26±0.12 | 0.31±0.11 | 0.211 | 0.29±0.09 | 0.34±0.09 | 0.002 | 0.30±0.10 | 0.35±0.11 | 0.069 | 0.33±0.11 | 0.34±0.13 | 0.536 | 0.29±.098 | 0.35±0.13 | 0.006 | 0.31±.093 | 0.33±0.11 | 0.199 | 0.33±0.16 | 0.30±0.11 | 0.467 |
| Overall PVD (%) | 54.51±4.24 | 55.40±2.65 | 0.003 | 53.67±1.20 | 58.24 | 0.193 | 55.40±1.98 | 54.91±2.49 | 0.554 | 54.80±2.66 | 55.74±2.16 | 0.030 | 54.83±2.22 | 55.39±3.00 | 0.420 | 54.38±2.94 | 55.56±2.57 | 0.131 | 53.92±7.65 | 55.49±2.51 | 0.154 | 54.83±2.24 | 55.10±3.21 | 0.603 | 53.78±3.03 | 55.20±2.42 | 0.071 |
| Superior-PVD | 51.30±6.00 | 53.02±3.80 | <0.001 | 51.03±1.40 | 56.82 | 0.184 | 51.04±3.89 | 52.29±4.37 | 0.412 | 51.77±4.61 | 53.27±3.50 | 0.040 | 51.60±3.72 | 53.09±3.81 | 0.129 | 50.64±3.72 | 53.38±3.89 | 0.014 | 50.84±10.19 | 52.74±3.51 | 0.196 | 51.62±4.02 | 53.04±4.19 | 0.061 | 50.91±3.97 | 52.89±4.00 | 0.087 |
| Inferior- PVD | 53.31±4.90 | 54.49±3.79 | 0.001 | 55.72±1.93 | 56.18 | 0.879 | 53.18±±3.70 | 53.29±4.04 | 0.937 | 53.98±3.49 | 54.66±3.36 | 0.270 | 54.05±3.05 | 54.55±3.92 | 0.591 | 52.08±4.22 | 55.17±3.74 | 0.008 | 52.88±7.98 | 54.75±3.38 | 0.114 | 53.21±3.57 | 53.96±4.54 | 0.316 | 53.10±3.46 | 54.73±3.55 | 0.109 |
| Nasal- PVD | 46.95±5.06 | 47.97±4.86 | 0.016 | 45.90±0.47 | 56.70 | 0.034 | 48.16±3.27 | 47.35±4.56 | 0.582 | 46.97±4.43 | 48.66±3.95 | 0.024 | 46.13±4.73 | 47.78±5.18 | 0.202 | 47.26±4.08 | 48.78±4.31 | 0.207 | 46.51±7.41 | 47.95±4.84 | 0.228 | 47.22±3.75 | 47.11±6.21 | 0.909 | 47.38±4.68 | 47.83±3.53 | 0.700 |
| Temporal- PVD | 54.16±9.43 | 53.89±11.63 | 0.763 | 52.45±5.57 | 59.60 | 0.485 | 56.26±3.45 | 52.62±13.86 | 0.346 | 55.31±3.24 | 54.28±9.90 | 0.446 | 55.30±2.35 | 51.58±15.31 | 0.241 | 53.42±12.15 | 52.38±14.78 | 0.791 | 55.13±8.03 | 53.37±13.30 | 0.389 | 50.96±15.78 | 55.17±8.56 | 0.072 | 55.30±2.94 | 54.49±11.26 | 0.740 |

Data are presented as means ± standard deviation. PVD = Peripapillary vessel density, BMI = body mass index, FAZ = foveal avascular zone, SCP = superficial capillary plexus, DCP = deep capillary plexus, IOP = intra ocular pressure, SBP = systolic blood pressure, DBP = diastolic blood pressure.
